# Supplementary material for: Encapsulation of Olive Leaf Polyphenol-Rich Extract in Polymeric Micelles to Improve Its Intestinal Permeability
Source: MDPI journal article supplement (doi:10.3390/nano13243147), 2023-12-15
Supplement: s1 [file s1]

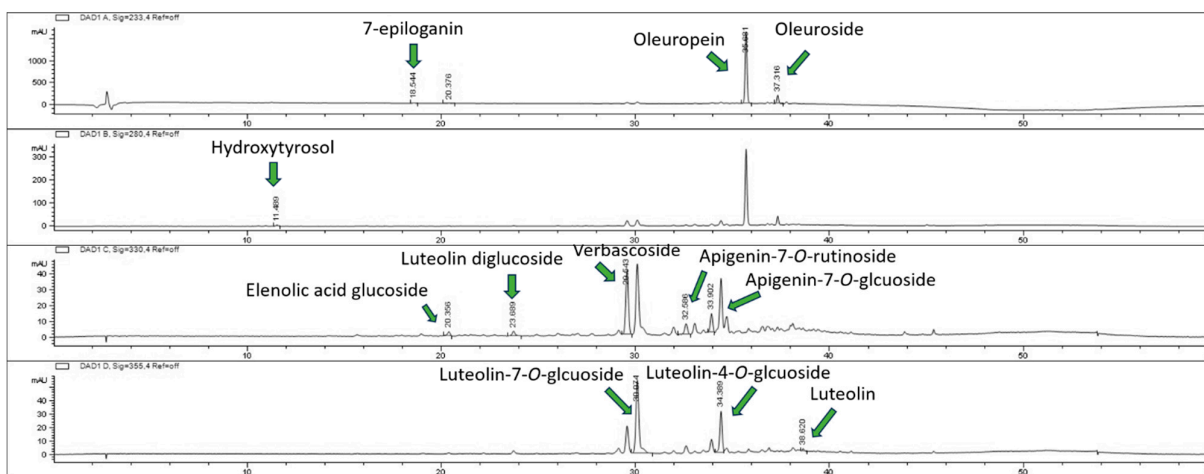

**Figure S1.** Chromatographic profiles of OPA40.

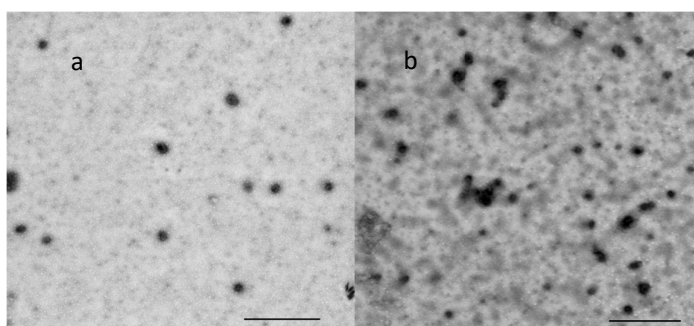

**Figure S2.** MM-OPA40 (a) and freeze-dried MM-OPA40 (b) TEM analysis. Bar: 100 nm.

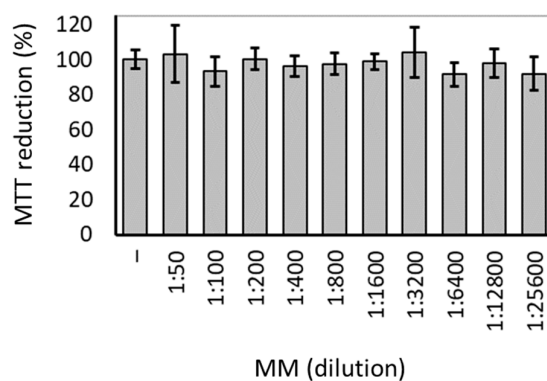

**Figure S3.** Cell viability of Caco-2 cells treated with empty MM at various dilutions for 3h. Untreated cells were used as control (-). The values were reported as percentages compared to control cells. The data were obtained from the mean  $\pm$  standard deviation of three experiments.
